# Supplementary material
Source: PubMed Central journal article supplement (PMC8669600)
Supplement: jamapediatr-e215095-s001.pdf [file jamapediatr-e215095-s001.pdf]

## Supplemental Online Content

Wu AJ, Aris IM, Hivert MF, et al. Association of changes in obesity prevalence with the COVID-19 pandemic in youth in Massachusetts. *JAMA Pediatr*. Published online December 13, 2021. doi:10.1001/jamapediatrics.2021.5095

### eMethods

This supplemental material has been provided by the authors to give readers additional information about their work.

## eMethods

We deliberately stratified our analysis by race/ethnicity. We acknowledge race and ethnicity to be a social construct and aimed to investigate the potential racial and ethnic inequalities in rising childhood obesity prevalence during the COVID-19 pandemic.

We used Stata 16 software (StataCorp LLC, College Station, Texas) for all analyses. We used linear regression models to estimate the change in obesity prevalence in 2018-2019 and 2019-2020. We conducted analyses for the overall cohort and by sex, and we also stratified the analyses by age group and race/ethnicity. We estimated “differences in trends” and the corresponding 95% confidence intervals by subtracting the difference in obesity prevalence prepandemic

(2018-2019) from the difference in obesity prevalence during the pandemic (2019-2020) using the *lincom* function in Stata.
